# Supplementary material for: Systematic extension of the length of the organic conjugated π-system of mesoporous silica-based organic–inorganic hybrid materials
Source: Royal Society of Chemistry journal article supplement (doi:10.1039/b801034j), 2008-01-01
Supplement: b801034j.pdf [file b801034j.pdf]

## Supporting Information

### Systematic Extension of the Length of the Organic Conjugated $\pi$ -System of Mesoporous Silica-based Organic-Inorganic Hybrid Materials

Maximilian Cornelius, Frank Hoffmann, Boris Ufer, Peter Behrens and Michael Fröba\*

#### Characterisation of the new organosilane precursors:

#### Characterisation of the organosilane precursor 4,4'-bis-((*E*)-2-(triethoxysilyl)vinyl)stilbene (BTEVS)

$^1\text{H}$  NMR:

$^1\text{H}$  NMR ( $\text{CDCl}_3$ , 200 MHz):  $\delta$  1.28 (*t*, 18 H,  $J = 7.0$  Hz), 3.89 (*q*, 12 H,  $J = 7.0$  Hz), 6.19 (*d*, 2 H,  $J = 19.3$  Hz), 7.1 (*s*, 2 H), 7.22 (*d*, 2 H,  $J = 19.3$  Hz), 7.48 (*s*, 8 H);

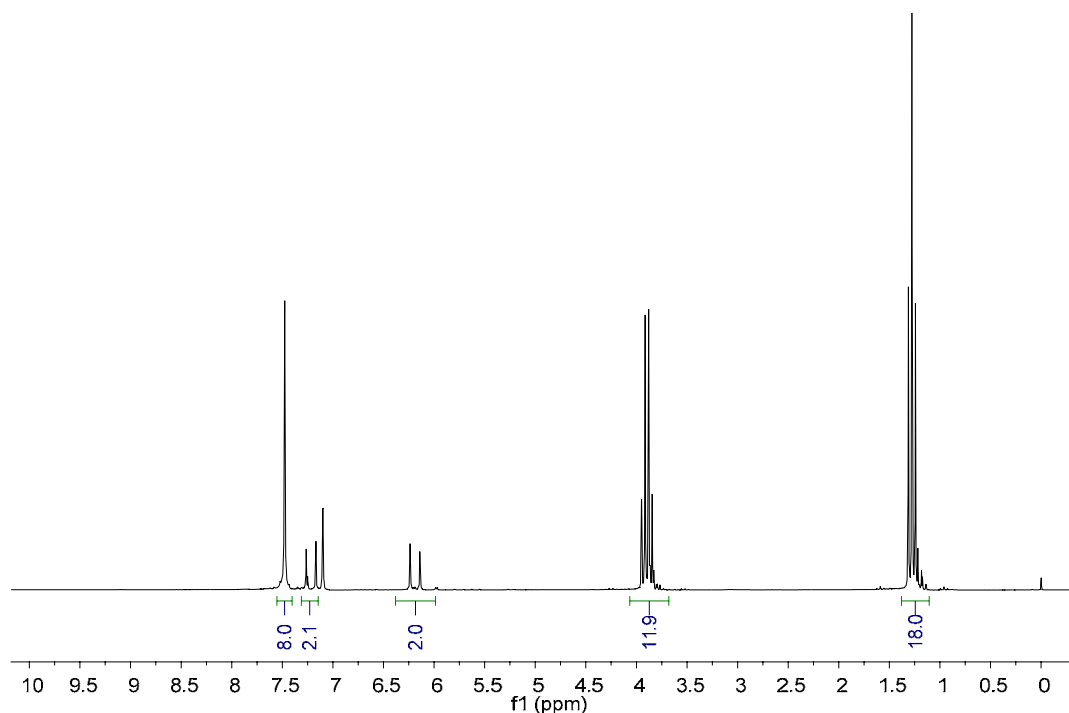

**Figure S1.**  $^1\text{H}$  NMR spectrum of 4,4'-bis-((*E*)-2-(triethoxysilyl)vinyl)stilbene measured in  $\text{CDCl}_3$ .

$^{13}\text{C} \{^1\text{H}\}$  NMR:

$^{13}\text{C} \{^1\text{H}\}$  NMR ( $\text{CDCl}_3$ , 100 MHz):  $\delta$  18.4 ( $\text{CH}_3\text{-CH}_2$ ), 58.7 ( $\text{CH}_3\text{-CH}_2$ ), 117.7 ( $\text{CH-Si}$ ), 126.8 ( $\text{C}_{\text{arom.H}}$ ), 127.2 ( $\text{C}_{\text{arom.H}}$ ), 128.6 ( $\text{CH-C}_{\text{arom.}}$ ), 137.0 ( $\text{C}_{\text{arom.}}$ ), 137.7 ( $\text{C}_{\text{arom.}}$ ), 148.6 ( $\text{CH-C}_{\text{arom.}}$ );

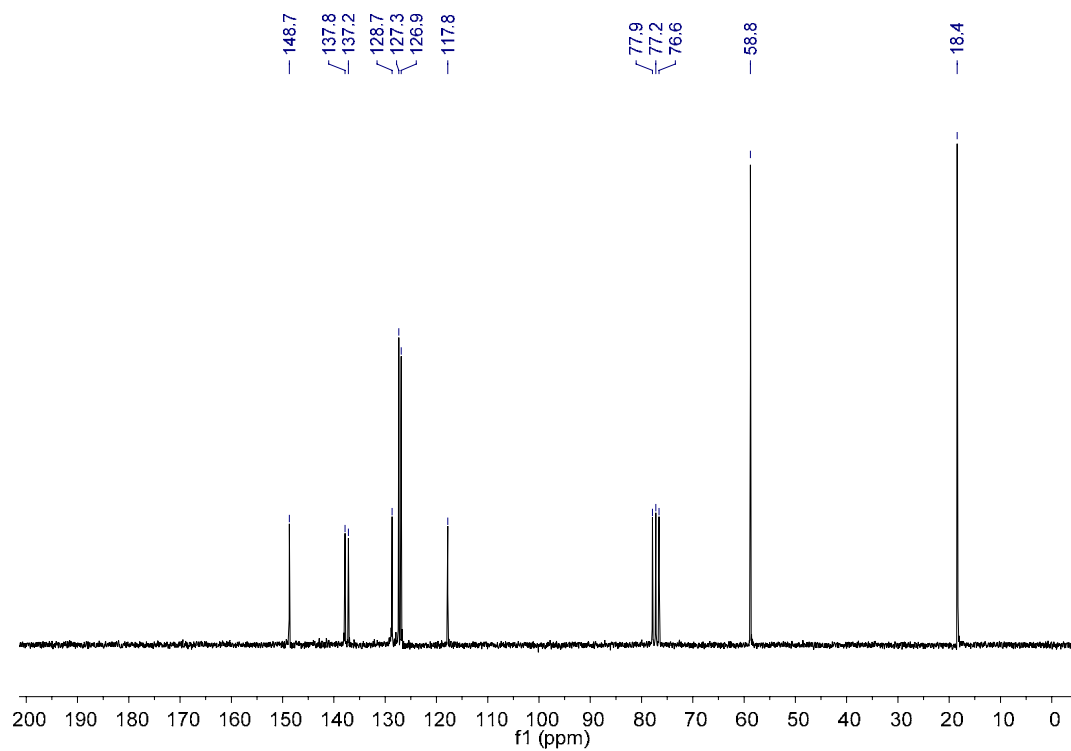

**Figure S2.**  $^{13}\text{C} \{^1\text{H}\}$  NMR spectrum of 4,4'-bis-((*E*)-2-(triethoxysilyl)vinyl)stilbene measured in  $\text{CDCl}_3$ .

FT-IR:

FT-IR (film,  $\text{cm}^{-1}$ ): 2975, 2926, 2887, 1602, 1513, 1390, 1166, 1102, 1079, 962, 827, 802

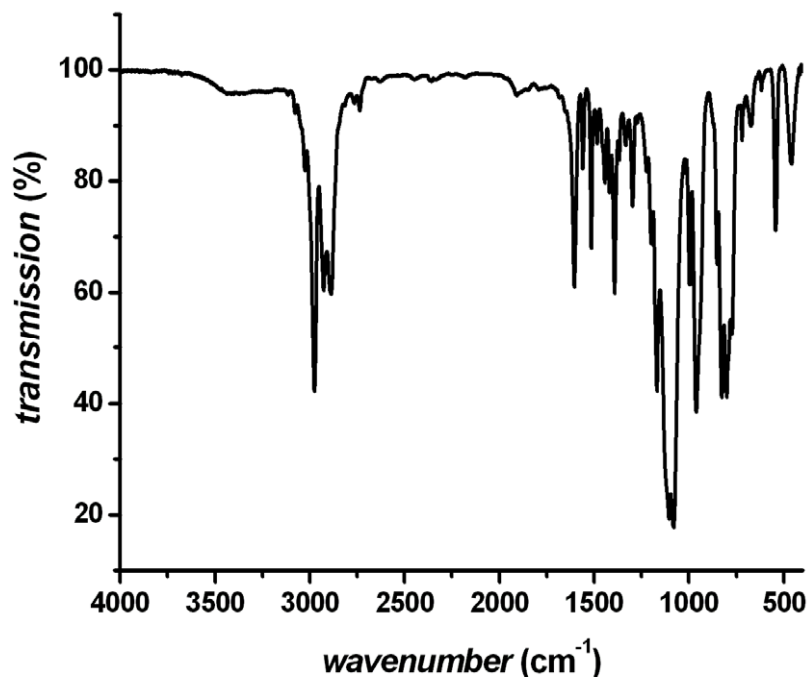

**Figure S3.** FT-IR spectrum of 4,4'-bis-((*E*)-2-(triethoxysilyl)vinyl)stilbene measured as film.

**Characterisation of the organosilane precursor 4,4'-bis-((*E*)-2-(triethoxysilyl)vinyl)diazene (BTEVAB)**

<sup>1</sup>H-NMR:

<sup>1</sup>H-NMR (CDCl<sub>3</sub>, 200 MHz)  $\delta$  (ppm) = 1,16 (*t*, 18 H,  $J = 7,0$  Hz, CH<sub>2</sub>-CH<sub>3</sub>); 3,79 (*q*, 12 H,  $J = 7,0$  Hz, O-CH<sub>2</sub>); 6,18 (*d*, 2 H,  $J = 19,3$  Hz, CH=CH-Si); 7,16 (*d*, 2 H,  $J = 19,3$  Hz, CH=CH-Si); 7,48 (*m*, 4 H, CH=CH-C<sub>arom.</sub>-C<sub>arom.</sub>-H); 7,79 (*m*, 4 H, N=N-C<sub>arom.</sub>-C<sub>arom.</sub>-H)

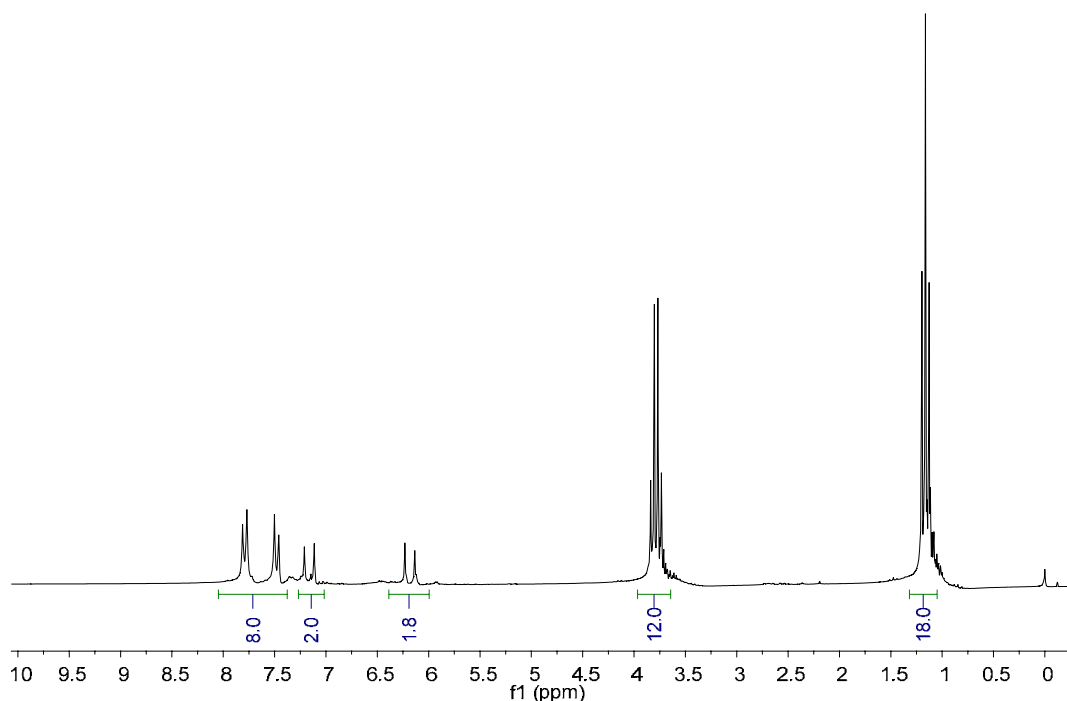

**Figure S4.** <sup>1</sup>H NMR spectrum of 4,4'-bis-((*E*)-2-(triethoxysilyl)vinyl)diazene measured in CDCl<sub>3</sub>.

$^{13}\text{C} \{^1\text{H}\}$ -NMR:

$^{13}\text{C} \{^1\text{H}\}$ -NMR ( $\text{CDCl}_3$ , 50 MHz)  $\delta$  (ppm) = 17,9 ( $\text{CH}_2\text{-CH}_3$ ); 58,2 ( $\text{O-CH}_2$ ); 119,8 ( $\text{Si-CH}$ );  
123,2 ( $\text{CH=CH-Si}$ ); 127,2 ( $\text{N=N-C}_{\text{arom.}}\text{-C}_{\text{arom.}}\text{-H}$ ); 139,7 ( $\text{CH=CH-C}_{\text{arom.}}\text{-C}_{\text{arom.}}\text{-H}$ ); 147,8  
( $\text{C}_{\text{arom.}}\text{-CH=CH}$ ); 152,2 ( $\text{C}_{\text{arom.}}\text{-N=N}$ )

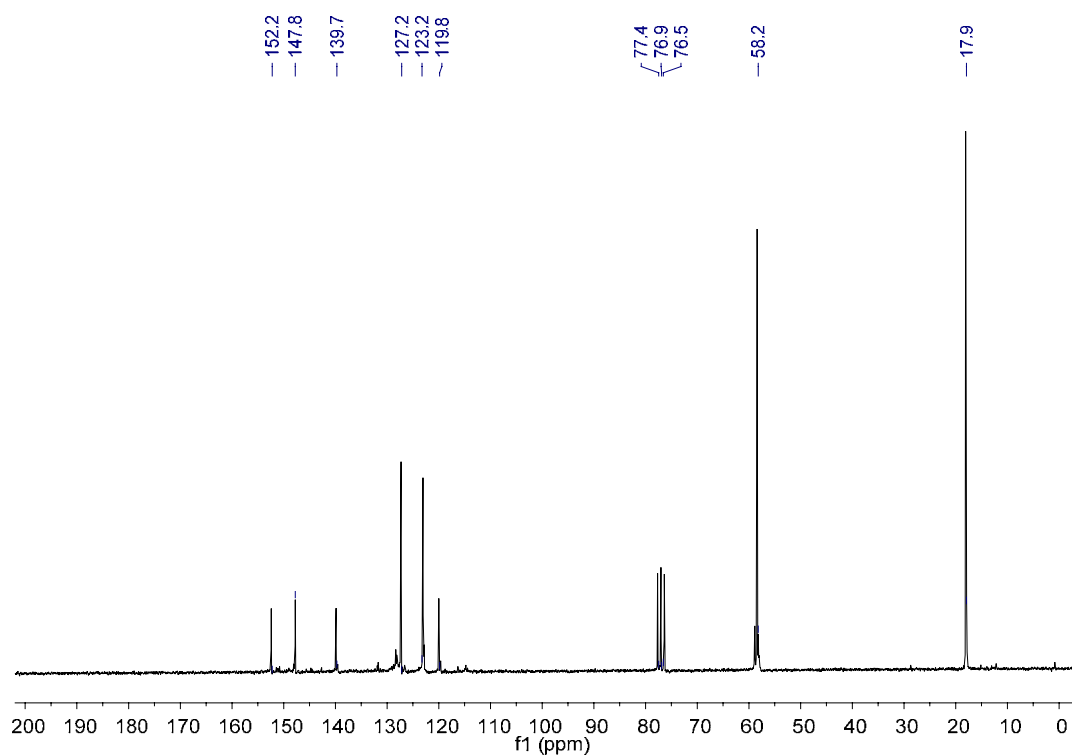

**Figure S5.**  $^{13}\text{C} \{^1\text{H}\}$  NMR spectrum of 4,4'-bis-((*E*)-2-(triethoxysilyl)vinyl)diazene measured in  $\text{CDCl}_3$ .

FT-IR:

FT-IR (Film,  $\text{cm}^{-1}$ ): 2973, 2925, 2886, 1600, 1390, 1166, 1101, 1078, 959, 805

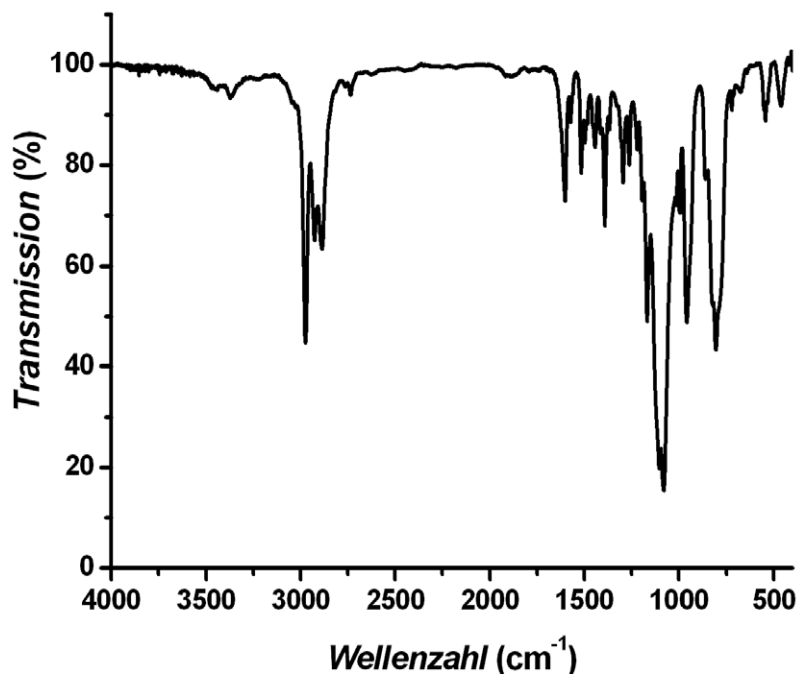

**Figure S6.** FT-IR spectrum of 4,4'-bis-((*E*)-2-(triethoxysilyl)vinyl)diazene measured as film.

## Characterisation of the mesoporous hybrid materials

### Ethene-bridged hybrid material (1):

The powder X-ray diffraction pattern of the mesoporous ethene-bridged hybrid material reveals only one reflection at  $2.05^\circ 2\theta$  ( $d = 4.31$  nm), indicating a periodic arrangement of the mesopores. The lack of further reflections in the wide-angle region indicates no crystal-like arrangement of the organic spacers within the pore walls.

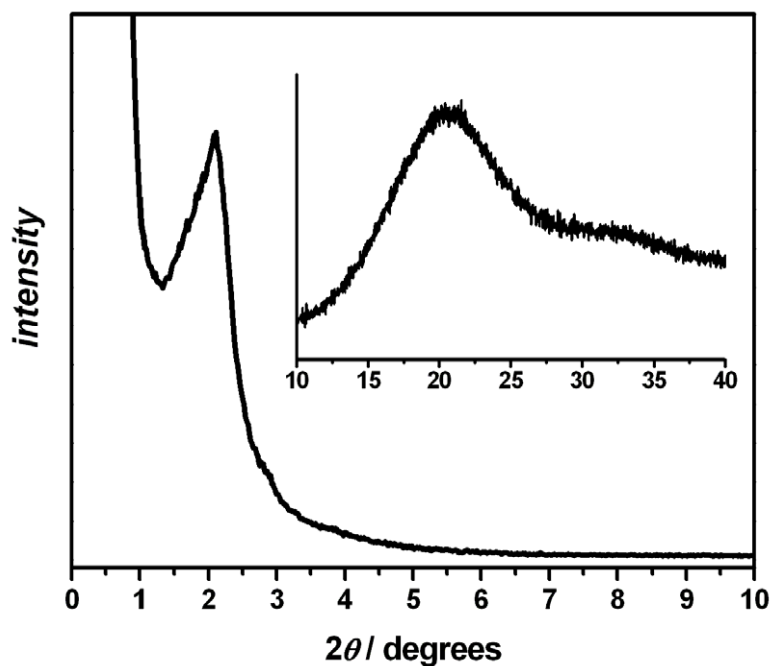

**Figure S7.** Powder X-ray diffraction pattern of the mesoporous ethene-bridged hybrid material.

**Benzene-bridged hybrid material (2):**

The powder X-ray diffraction pattern of the mesoporous benzene-bridged hybrid material reveals at least one sharp reflection at  $2.02^\circ 2\theta$  ( $d = 4.37$  nm), indicating a periodic arrangement of the mesopores. In addition three peaks at  $2\theta = 11.59^\circ$  ( $d = 0.76$  nm),  $23.26^\circ$  ( $0.38$  nm),  $35.39^\circ$  ( $0.25$  nm), which can be attributed to a crystal-like arrangement of the organic spacers within the pore walls.

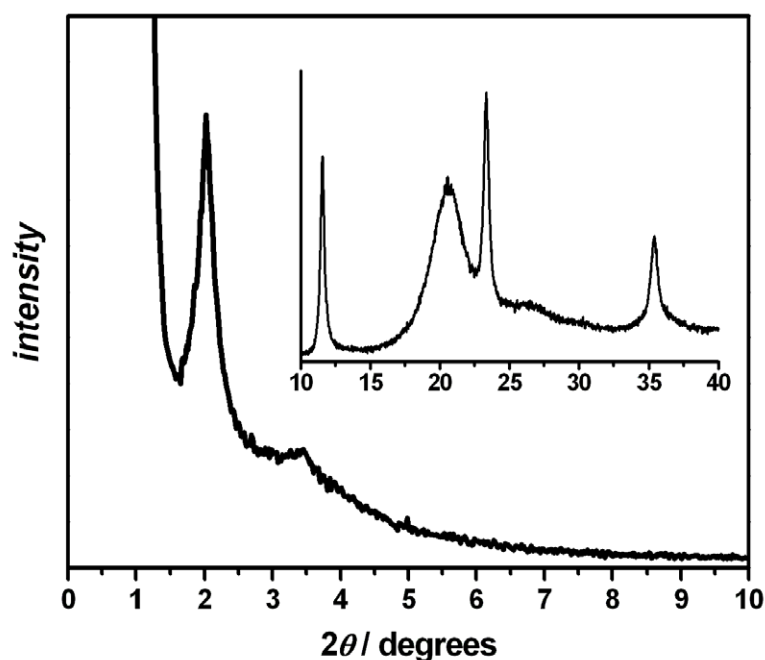

**Figure S8.** Powder X-ray diffraction pattern of the mesoporous benzene-bridged hybrid material.

The nitrogen physisorption measurement shows a type IV isotherm with a capillary condensation step at  $p/p^0 = 0.3$ . The mean pore diameter and the pore volume, as determined from the desorption branch by the BJH method, are 2.7 nm and  $0.56 \times 10^{-6} \text{ m}^3/\text{g}$ , respectively. The specific surface area determined by the BET method is  $760 \text{ m}^2/\text{g}$ .



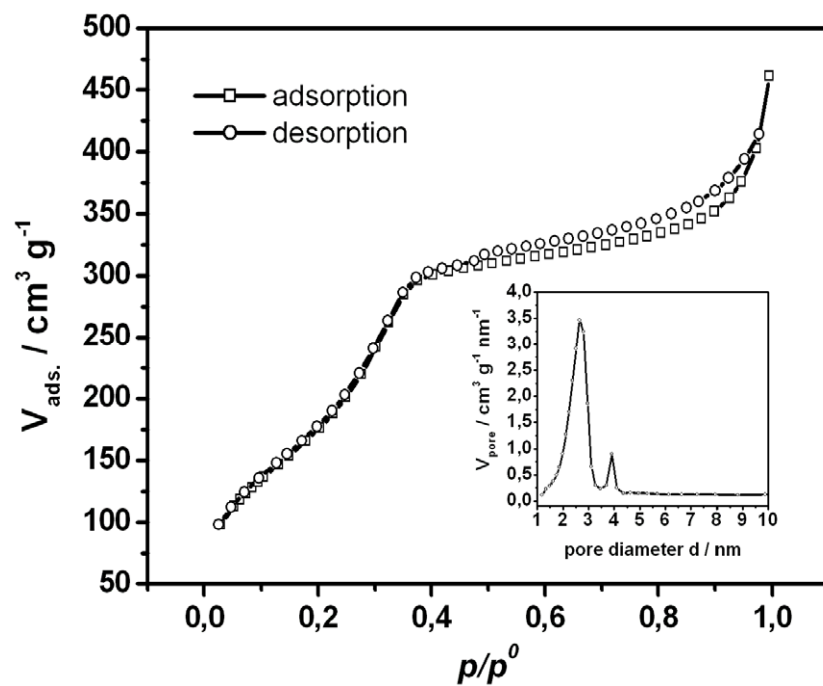

**Figure S9.**  $\text{N}_2$ -physorption measurement of the mesoporous benzene-bridged PMO material measured at 77 K.

**1,4-divinylbenzene-bridged hybrid material (3):**

The powder X-ray diffraction pattern of the mesoporous 1,4-divinylbenzene-bridged hybrid material reveals one sharp reflection at  $1.87^\circ 2\theta$  ( $d = 4.72$  nm), indicating a periodic arrangement of the mesopores. In addition five peaks at  $2\theta = 7.42^\circ$  ( $d = 1.19$  nm),  $14.78^\circ$  (0.60 nm),  $22.17^\circ$  (0.40 nm),  $29.82^\circ$  (0.30 nm),  $37.42^\circ$  (0.24 nm) which can be attributed to a crystal-like arrangement of the organic spacers within the pore walls.

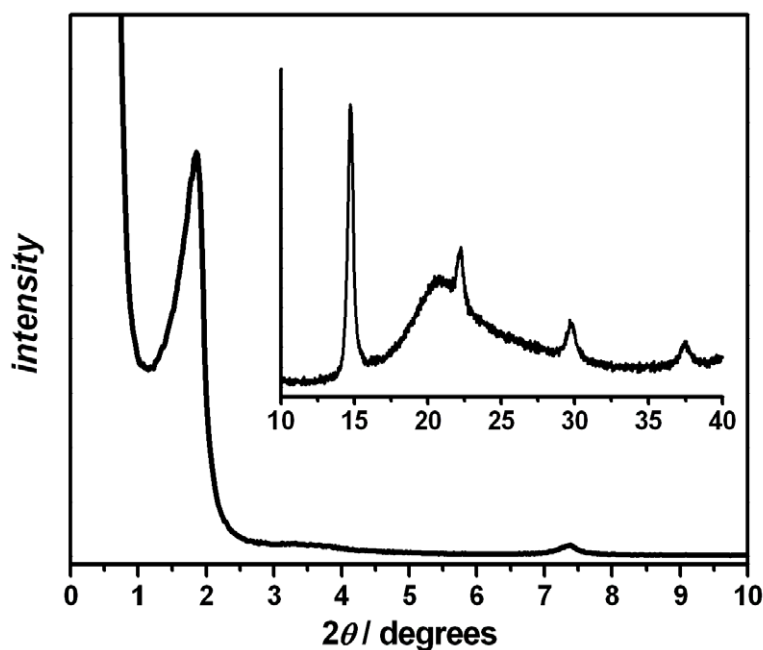

**Figure S10.** Powder X-ray diffraction pattern of the mesoporous 1,4-divinylbenzene-bridged hybrid material.

The nitrogen physisorption measurement shows a type IV isotherm with a capillary condensation step at  $p/p^0 = 0.35$ . The mean pore diameter and the pore volume, as determined from the desorption branch by the BJH method, are 2.8 nm and  $0.62 \times 10^{-6} \text{ m}^3/\text{g}$ , respectively. The specific surface area determined by the BET method is  $794 \text{ m}^2/\text{g}$ .

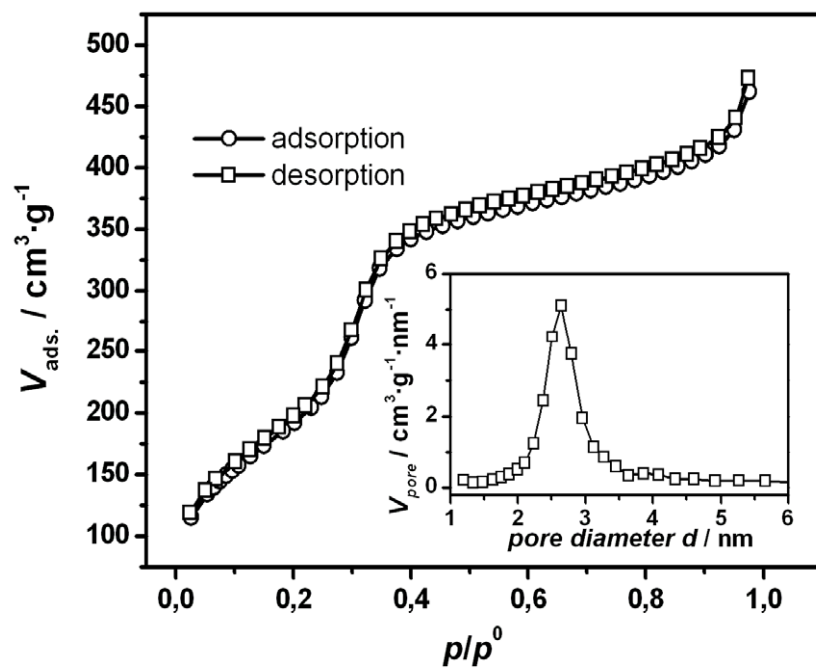

**Figure S11.** N<sub>2</sub>-physorption measurement of the mesoporous 1,4-divinylbenzene-bridged PMO material measured at 77 K.

### <sup>29</sup>Si MAS NMR

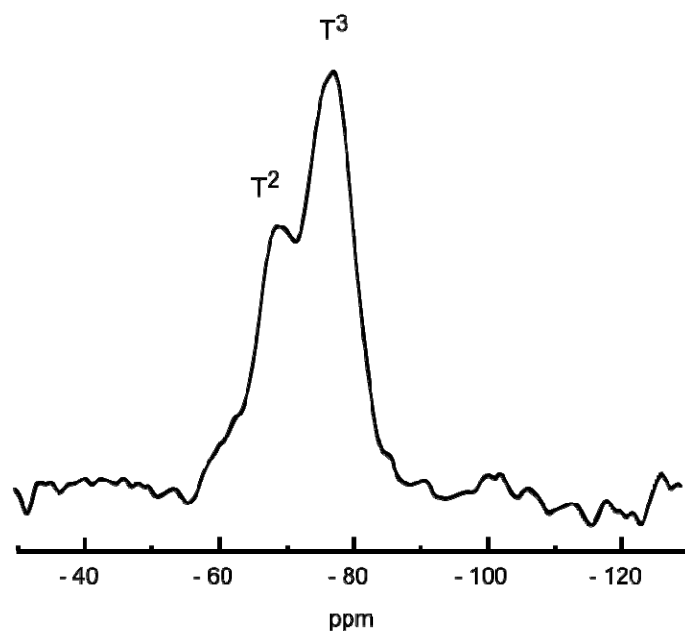

**Figure S12.** <sup>29</sup>Si MAS NMR spectrum of the mesoporous 4,4'-divinylstilbene-bridged hybrid material.

**Transmission electron microscopy:**

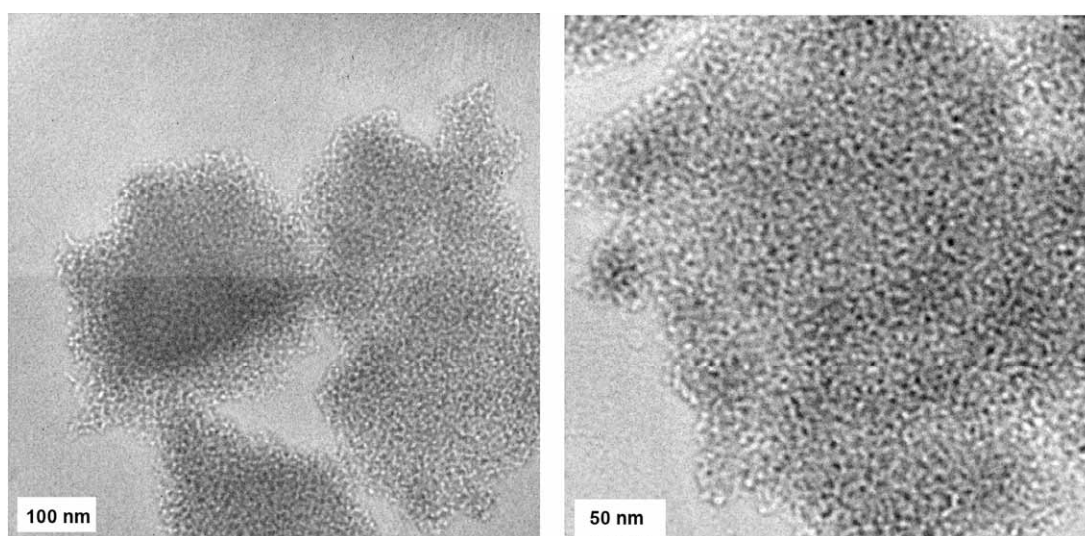

**Figure S13.** TEM images of the mesoporous 4,4'-divinylstilbene-bridged hybrid material.

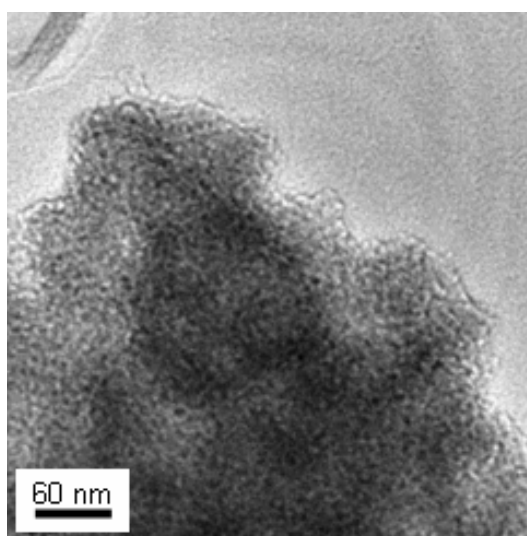

**Figure S14.** TEM image of the mesoporous 4,4'-divinylazobenzene-bridged hybrid material
